# Supplementary material for: Anopheles bionomics, insecticide resistance mechanisms, and malaria transmission in the Korhogo area, northern Côte d’Ivoire: a pre-intervention study
Source: Parasite. 2019 Jul 12;26:40. doi: 10.1051/parasite/2019040 (PMC6625791; doi:10.1051/parasite/2019040)
Supplement: Supplementary file 1 [file parasite-26-40-olm.pdf]

## Quality control of mosquito collections

Date:

**SUPERVISOR:**

**Village:**

House number:

**0: satisfactory**

**1: unsatisfactory**

[illegible]
